# Supplementary material for: High valence MnO2 as an aqueous zinc ion battery cathode prepared using a secondary hydrothermal method
Source: Royal Society of Chemistry journal article supplement (doi:10.1039/d4dt02724h), 2024-11-21
Supplement: d4dt02724h1.pdf [file d4dt02724h1.pdf]

## High valence MnO<sub>2</sub> for aqueous zinc ion battery cathode by secondary hydrothermal method

Xiaoxia Lv \*, Yun Wang, Wenjing Zhang, Tengfei Wang,

Key Laboratory of Catalytic Conversion and Clean Energy in Universities of Shandong Province, School of Chemistry and Chemical Engineering, Qufu Normal University, Qufu, Shandong, P.R. China. Email: lvxx@qfnu.edu.cn

### The calculation of ionic diffusion coefficients

In our GITT study, a cell was charged or discharged at 100 mA g<sup>-1</sup> rate for 10 min, followed by a 30 min open circuit step to allow relaxation back to equilibrium. The procedure was continued until the charge (or discharge) voltage reached 1.9 V (0.9 V). The Zn<sup>2+</sup> diffusion coefficients could be calculated using the following equation first outlined by Weppner and Huggins:

$$D = \frac{4}{\pi} \left( \frac{V_m}{Z_A F S} \right)^2 \left( \frac{dE/d\delta}{dE/d\sqrt{t}} \right)^2$$

where  $I$  is the current (A);  $V_m$  is the molar volume of the WBEC (cm<sup>3</sup> mol<sup>-1</sup>);  $Z_A$  is the charge number;  $F$  is the Faraday's constant (96485 C mol<sup>-1</sup>);  $S$  is the electrode/electrolyte contact area (cm<sup>2</sup>);  $dE/d\delta$  is the slope of the coulometric titration curve, found by plotting the steady state voltages  $E$  (V) measured after each titration step  $\delta$ ;  $dE/d\sqrt{t}$  is the slope of the linearized plot of the potential  $E$  (V) during the current pulse of duration  $t$  (s). If sufficiently small currents are applied for short time intervals, so that  $dE/d\sqrt{t}$  can be considered linear and the coulometric titration curve can be also considered linear over the composition range involved in that step, the above equation can be simplified into:

$$D = \frac{4}{\pi \tau} \left( \frac{n_m V_m}{S} \right)^2 \left( \frac{\Delta E_s}{\Delta E_\tau} \right)^2$$

Here,  $\tau$  is the duration of the current pulse (s);  $n_m$  is the number of moles (mol);  $V_m$  is the molar volume of the electrode (cm<sup>3</sup> mol<sup>-1</sup>);  $S$  is the electrode/electrolyte contact area (cm<sup>2</sup>);  $\Delta E_s$  is the steady-state voltage change, due to the current pulse and  $\Delta E_\tau$  is the voltage change during the constant current pulse, eliminating the  $iR$  drop.

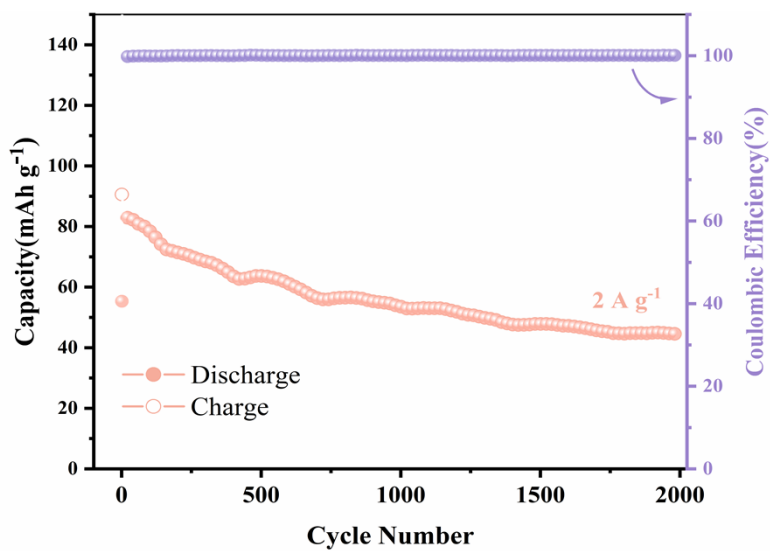

Fig S1. long cycle performance diagram of MnO<sub>2</sub>

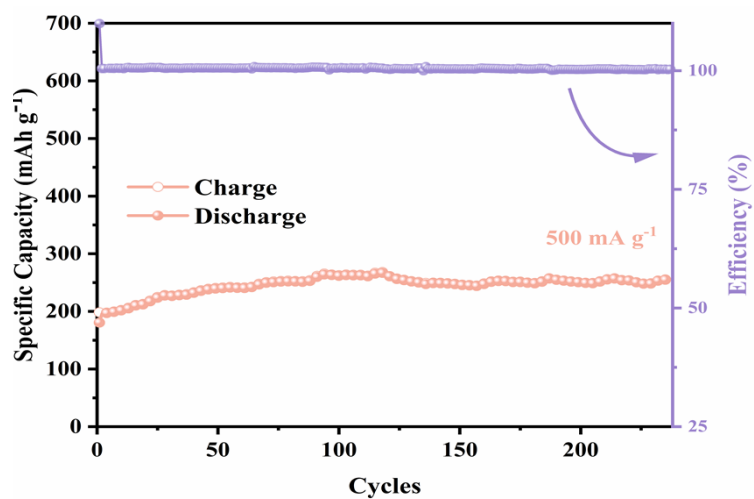

Fig S2. long cycle performance diagram of H-MnO<sub>2</sub>
